# Supplementary material for: Hiring Preferences in Online Labor Markets: Evidence of a Female Hiring Bias
Source: Atypon-hosted journal article supplement (doi:10.1287/mnsc.2017.2756), 2017-06-27
Supplement: mnsc.2017.2756-sm.pdf [file mnsc.2017.2756-sm.pdf]

## Appendix A: Details for Literature Review

### Appendix A1: Summary of Predictions on Gender-Related Bias

| <b>Variable of Interest</b> | <b>Predicted Direction of Bias</b>                                           | <b>Related Works</b>                                              |
|-----------------------------|------------------------------------------------------------------------------|-------------------------------------------------------------------|
| Competency                  | In favor of Males                                                            | Fiske et al. (2002),<br>Kuhn and Skuterud (2004)                  |
| Warmth/Trustworthiness      | In favor of Females                                                          | Fiske et al. (2002),<br>Pope and Sydnor (2009),<br>Ravina (2012)  |
| Cooperativeness             | In favor of Females                                                          | Eckel et al. (2008),<br>Steffens et al. (2009)                    |
| Physical Attractiveness     | In favor of Females                                                          | Eagly et al. (1991),<br>Hancock and Toma (2009),<br>Ravina (2012) |
| <b>Moderating Variable</b>  |                                                                              |                                                                   |
| <b>Moderating Variable</b>  | <b>Predicted Impact on Bias</b>                                              | <b>Related Works</b>                                              |
| Employer Experience         | Greater experience → Less bias                                               | Pavlou and Gefen (2004),<br>Stewart (2003)                        |
| Worker Country of Origin    | Workers from developed countries → Less bias                                 | Hofstede (1983)                                                   |
| Occupation Type             | Gender-typed job →<br>Directionality of bias dependent<br>on occupation type | Perry et al. (1994),<br>Zebrowitz et al. (1991)                   |
| Employer Gender             | Female employers → More bias                                                 | Darley and Smith (1995),<br>Myers-Levy and Sternthal (1991)       |

## **Appendix B: Details for Empirical Methodology**

### **Appendix B1: Matching Procedure Details and Assessment of Matching Validity**

As a baseline, we employ one-to-one matching under common support, with a caliper size of 0.01 to locate similar male and female workers within the same job category (e.g., administrative support, web development, sales and marketing) and the same job posting, respectively. To assess the robustness of the main results with respect to different matched samples, we further utilize a stricter caliper size of 0.001 in our matching algorithm. Table B1 shows the balance check results for the matching. For all matched covariates, the standardized bias in the matched sample is within the recommended cut-off threshold of 0.05 across all matching schemes (Caliendo and Kopeinig 2008). We also note that the biases between the treated and the control groups are greatly reduced after matching, with a 60 to 100 percentage reduction in bias across most covariates after matching. This set of balance statistics suggests the matching technique has helped to produce statistically similar sets of female and male applicants. Figure B1 shows that the propensity score distribution of male workers becomes more similar to that of female workers after matching. Additionally, in the graph depicting the unmatched sample, we see that the distribution of male workers spans the entire propensity score range of female workers, which means that female workers in the original sample do not hold traits that make them highly dissimilar to male workers.

**Table B1: Balance Check of Covariates after Matching**

| Variable                             | Job Category Match, Caliper Size = 0.01 |              |                   |                        | Job Category Match, Caliper Size = 0.001 |              |                   |                        |
|--------------------------------------|-----------------------------------------|--------------|-------------------|------------------------|------------------------------------------|--------------|-------------------|------------------------|
|                                      | Mean of Female                          | Mean of Male | Standardized Bias | Percentage Improvement | Mean of Female                           | Mean of Male | Standardized Bias | Percentage Improvement |
| <i>Job-specific attributes:</i>      |                                         |              |                   |                        |                                          |              |                   |                        |
| Log(Hourly Wage)                     | 1.2612                                  | 1.2161       | 0.046             | 78.5                   | 1.2416                                   | 1.2086       | 0.034             | 84.2                   |
| Received Employer Invitation         | 0.07326                                 | 0.07326      | 0.000             | 100                    | 0.06915                                  | 0.06915      | 0.000             | 100                    |
| Sent Cover Letter                    | 0.13135                                 | 0.13860      | 0.022             | 57.5                   | 0.13060                                  | 0.13964      | 0.027             | 47.0                   |
| Previously Hired                     | 0.00945                                 | 0.00945      | 0.000             | 100                    | 0.00755                                  | 0.00789      | 0.000             | 100                    |
| <i>Worker-Declared attributes:</i>   |                                         |              |                   |                        |                                          |              |                   |                        |
| Education                            | 2.7387                                  | 2.7488       | 0.009             | 73.2                   | 2.7433                                   | 2.7462       | 0.002             | 93.0                   |
| Number of Certifications             | 0.54504                                 | 0.56097      | 0.013             | 90.4                   | 0.54028                                  | 0.56011      | 0.016             | 88.0                   |
| Past Employment                      | 1.7836                                  | 1.7717       | 0.006             | 96.8                   | 1.7799                                   | 1.7585       | 0.011             | 94.2                   |
| English Proficiency                  | 4.8822                                  | 4.8790       | 0.007             | 54.1                   | 4.8871                                   | 4.8779       | 0.020             | -35.4                  |
| Number of Portfolio Items            | 6.5729                                  | 6.3147       | 0.019             | 91.0                   | 6.5103                                   | 6.3055       | 0.015             | 92.9                   |
| Country                              |                                         |              |                   |                        |                                          |              |                   |                        |
| Bangladesh                           | 0.35264                                 | 0.35927      | 0.014             | 93.5                   | 0.24056                                  | 0.25220      | 0.027             | 93.7                   |
| India                                | 0.24107                                 | 0.25167      | 0.025             | 90.3                   | 0.24022                                  | 0.25139      | 0.026             | 89.7                   |
| Philippines                          | 0.25338                                 | 0.25543      | 0.005             | 99.2                   | 0.07633                                  | 0.06595      | 0.035             | 87.6                   |
| Pakistan                             | 0.07264                                 | 0.06432      | 0.029             | 89.3                   | 0.25913                                  | 0.26239      | 0.008             | 98.9                   |
| United States                        | 0.05015                                 | 0.04363      | 0.031             | 85.7                   | 0.04867                                  | 0.04141      | 0.034             | 84.1                   |
| China                                | 0.00668                                 | 0.00460      | 0.019             | 84.1                   | 0.00673                                  | 0.00464      | 0.019             | 84.0                   |
| Ukraine                              | 0.00655                                 | 0.00541      | 0.012             | 86.6                   | 0.00653                                  | 0.00547      | 0.011             | 87.4                   |
| Sri Lanka                            | 0.00708                                 | 0.00641      | 0.008             | 86.8                   | 0.00720                                  | 0.00649      | 0.008             | 86.2                   |
| Russia                               | 0.00292                                 | 0.00230      | 0.009             | 90.0                   | 0.00294                                  | 0.00233      | 0.008             | 90.1                   |
| United Kingdom                       | 0.00688                                 | 0.00694      | 0.001             | 97.4                   | 0.00631                                  | 0.00656      | 0.003             | 89.8                   |
| <i>Platform-Verified attributes:</i> |                                         |              |                   |                        |                                          |              |                   |                        |
| Number of Tests                      | 5.1071                                  | 5.1469       | 0.010             | 93.2                   | 5.06420                                  | 5.14350      | 0.020             | 86.5                   |
| Feedback Rating                      | 3.3477                                  | 3.2957       | 0.024             | 65.2                   | 3.33450                                  | 3.28870      | 0.022             | 69.4                   |
| No. of Online Jobs                   | 13.3220                                 | 13.1270      | 0.007             | 89.1                   | 13.0340                                  | 12.9750      | 0.002             | 96.7                   |
| Agency Contractor                    | 0.25334                                 | 0.25334      | 0.000             | 100                    | 0.24739                                  | 0.24739      | 0.000             | 100                    |

**Table B1: Balance Check of Covariates after Matching (continued)**

| Variable                                    | Job Posting Match, Caliper Size = 0.01 |              |                   |                        | Job Posting Match, Caliper Size = 0.001 |              |                   |                        |
|---------------------------------------------|----------------------------------------|--------------|-------------------|------------------------|-----------------------------------------|--------------|-------------------|------------------------|
|                                             | Mean of Female                         | Mean of Male | Standardized Bias | Percentage Improvement | Mean of Female                          | Mean of Male | Standardized Bias | Percentage Improvement |
| <b><i>Job-specific attributes:</i></b>      |                                        |              |                   |                        |                                         |              |                   |                        |
| Log(Hourly Wage)                            | 1.05960                                | 1.01720      | 0.043             | 79.8                   | 0.84996                                 | 0.83069      | 0.020             | 90.8                   |
| Received Employer Invitation                | 0.03097                                | 0.02910      | 0.007             | 94.6                   | 0.02133                                 | 0.02089      | 0.002             | 98.7                   |
| Sent Cover Letter                           | 0.12737                                | 0.13914      | 0.035             | 31.0                   | 0.12880                                 | 0.14181      | 0.039             | 23.7                   |
| Previously Hired                            | 0.00011                                | 0.00011      | 0.000             | 100                    | 0.00004                                 | 0.00004      | 0.000             | 100                    |
| <b><i>Worker-Declared attributes:</i></b>   |                                        |              |                   |                        |                                         |              |                   |                        |
| Education                                   | 2.73320                                | 2.75850      | 0.021             | 39.0                   | 2.73070                                 | 2.74870      | 0.015             | 56.5                   |
| Number of Certifications                    | 0.57026                                | 0.60626      | 0.029             | 78.2                   | 0.60457                                 | 0.63565      | 0.025             | 81.2                   |
| Past Employment                             | 1.58890                                | 1.61870      | 0.016             | 91.9                   | 1.52010                                 | 1.53720      | 0.009             | 95.4                   |
| English Proficiency                         | 4.89200                                | 4.88980      | 0.005             | 67.2                   | 4.90290                                 | 4.89680      | 0.014             | 9.3                    |
| Number of Portfolio Items                   | 5.94520                                | 6.03200      | 0.006             | 97.0                   | 5.20660                                 | 5.3470       | 0.010             | 95.1                   |
| Country                                     |                                        |              |                   |                        |                                         |              |                   |                        |
| India                                       | 0.24889                                | 0.24541      | 0.008             | 96.8                   | 0.20905                                 | 0.21398      | 0.012             | 95.5                   |
| Bangladesh                                  | 0.43632                                | 0.45197      | 0.034             | 84.7                   | 0.51718                                 | 0.52555      | 0.018             | 91.8                   |
| Philippines                                 | 0.19235                                | 0.19620      | 0.009             | 98.6                   | 0.17096                                 | 0.17305      | 0.005             | 99.2                   |
| Pakistan                                    | 0.08005                                | 0.07159      | 0.029             | 89.1                   | 0.07346                                 | 0.06346      | 0.034             | 87.1                   |
| United States                               | 0.01854                                | 0.01450      | 0.019             | 91.1                   | 0.00994                                 | 0.00809      | 0.009             | 96.0                   |
| Ukraine                                     | 0.00494                                | 0.00429      | 0.007             | 92.3                   | 0.00330                                 | 0.00272      | 0.006             | 93.2                   |
| China                                       | 0.00602                                | 0.00506      | 0.009             | 92.6                   | 0.00410                                 | 0.00357      | 0.005             | 95.9                   |
| Russia                                      | 0.00229                                | 0.00192      | 0.005             | 94.0                   | 0.00157                                 | 0.00136      | 0.003             | 96.6                   |
| United Kingdom                              | 0.00233                                | 0.00251      | 0.002             | 92.6                   | 0.00117                                 | 0.00134      | 0.002             | 93.1                   |
| Sri Lanka                                   | 0.00828                                | 0.00657      | 0.019             | 66.6                   | 0.00927                                 | 0.00686      | 0.027             | 53.0                   |
| <b><i>Platform-Verified attributes:</i></b> |                                        |              |                   |                        |                                         |              |                   |                        |
| Number of Tests                             | 5.00050                                | 5.14470      | 0.036             | 75.4                   | 4.83740                                 | 4.98250      | 0.036             | 75.3                   |
| Feedback Rating                             | 3.25900                                | 3.29230      | 0.016             | 77.7                   | 3.11750                                 | 3.18850      | 0.033             | 52.5                   |
| Number of Online Jobs                       | 10.9230                                | 11.0740      | 0.005             | 91.6                   | 9.28380                                 | 9.58570      | 0.011             | 83.1                   |
| Agency Contractor                           | 0.23129                                | 0.22275      | 0.020             | 75.6                   | 0.19489                                 | 0.18828      | 0.016             | 81.2                   |

**Notes:** The figures reported for standardized bias are in absolute levels. Percentage improvement refers to the reduction in standardized bias in the matched sample compared to the unmatched sample. Country is coded as dummy variables.

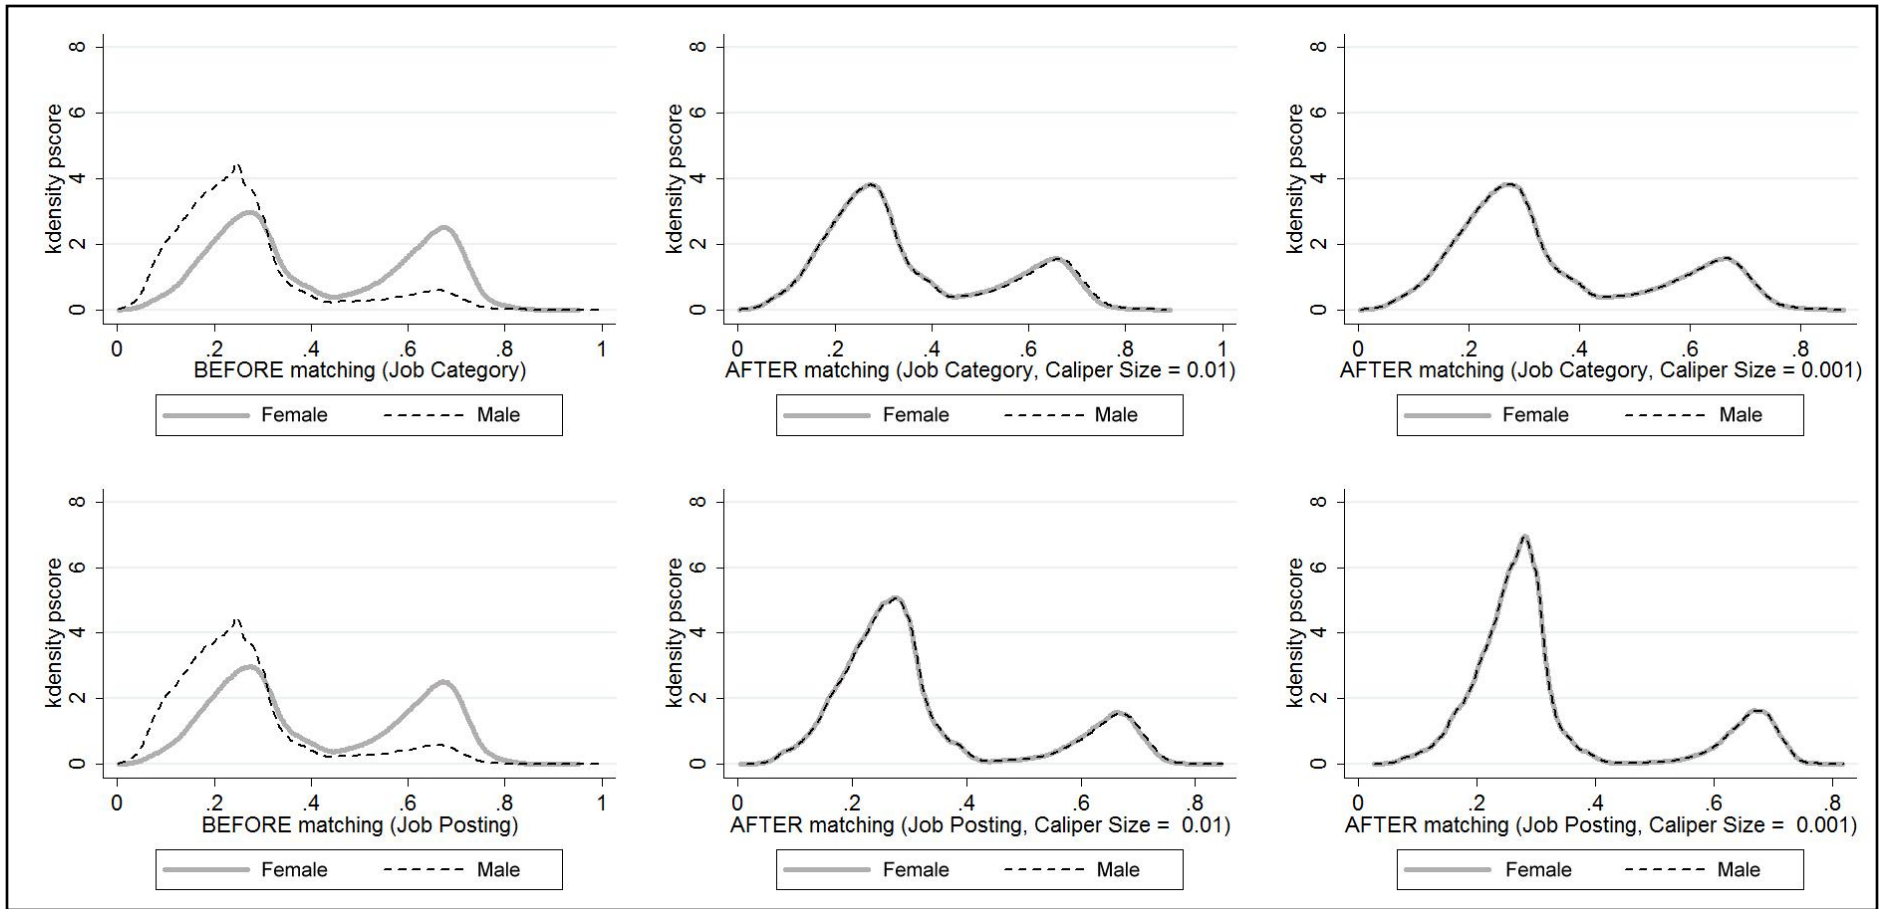

**Figure B1: P-Score Distribution of Female and Male Workers Before and After Matching**

## Appendix B2: Categorization of Job Postings

In the process of categorizing the list of online jobs into each type, we look towards salient gender attributes that are identified in the literature. In addition to the competency-by-warmth distinction that men and women have (McClelland 1975), males tend to perform better on tasks such as mental rotation, mechanical reasoning, math, and science knowledge, while females excel in verbal fluency, speech articulation, reading, and writing (Halpern 1997). Based on these distinctions across genders, jobs with major responsibilities in servicing others and having elements of frequent interpersonal communications are likely regarded as feminine occupations, and jobs that primarily involve technical problem solving, logic induction, and spatial design are likely associated as masculine occupations. Amidst the jobs available in our study context, administrative support and customer service distinctly fit the criteria of feminine occupations, while software development and web development are strongly aligned with the expectations of masculine occupations. Jobs such as design and multimedia, and sales and marketing do not exhibit salient attributes associated with either gender, and are likely to be gender-neutral jobs. We further rely on two external sources of information to affirm the job classifications. First, we tabulate the proportion of male to female applicants for these job categories and determine if they fall above or below the average male–female ratio of workers on the platform. Second, we rely on the occupation gender composition information provided by the Bureau of Labor Statistics (BLS; see <http://www.bls.gov>) to identify gender-dominated jobs. The categorization results based on these two alternative sources agree with our categorization.

**Table B2: Demographics of AMT Raters**

| <b>Demographic Attributes</b>  | <b>Frequency</b> | <b>Percentage</b> |
|--------------------------------|------------------|-------------------|
| <i>Education Degree</i>        |                  |                   |
| No schooling completed         | 2                | 0.012195          |
| High school graduate           | 50               | 0.304878          |
| Associate degree               | 27               | 0.164634          |
| Bachelors degree               | 64               | 0.390244          |
| Masters degree                 | 11               | 0.067073          |
| Professional degree            | 5                | 0.030488          |
| Doctorate degree               | 3                | 0.018293          |
| Unknown                        | 2                | 0.012195          |
| <i>Annual Household Income</i> |                  |                   |
| Less than \$10,000             | 7                | 0.042683          |
| \$10,000 to \$29,999           | 41               | 0.25              |
| \$30,000 to \$59,999           | 65               | 0.396341          |
| \$60,000 to \$99,999           | 34               | 0.207317          |
| \$100,000 to \$149,999         | 13               | 0.079268          |
| \$150,000 or more              | 3                | 0.018293          |
| Unknown                        | 1                | 0.006098          |

## Appendix C: Data Descriptive Details

**Table C1: Comparison of Worker Attributes 30 Days Before and After Photo Posting**

| <b>Worker Characteristic</b>                    | <b>T-value</b> | <b>P-value</b> |
|-------------------------------------------------|----------------|----------------|
| Hourly Wage Rate                                | 1.326          | 0.185          |
| Number of Employment Records                    | 0.115          | 0.909          |
| Number of Certificates                          | 0.807          | 0.420          |
| Number of Standardized Tests Passed             | 1.531          | 0.126          |
| Proportion of Applications in Admin Support     | 0.578          | 0.564          |
| Proportion of Applications in Sales & Marketing | 1.153          | 0.249          |
| Proportion of Applications in Web Development   | 0.805          | 0.421          |

**Table C2: Statistics of Applicants' Country of Origin**

| <b>Country</b> | <b>Frequency</b> | <b>Percentage of Total</b> | <b>Cumulative Percentage</b> |
|----------------|------------------|----------------------------|------------------------------|
| Bangladesh     | 963,323          | 30.39%                     | 30.39%                       |
| India          | 770,587          | 24.31%                     | 54.70%                       |
| Philippines    | 554,340          | 17.49%                     | 72.19%                       |
| Pakistan       | 319,716          | 10.09%                     | 82.28%                       |
| United States  | 118,371          | 3.73%                      | 86.01%                       |
| China          | 43,256           | 1.36%                      | 87.37%                       |
| Ukraine        | 35,421           | 1.12%                      | 88.49%                       |
| Sri Lanka      | 26,452           | 0.83%                      | 89.32%                       |
| Russia         | 21,395           | 0.67%                      | 89.99%                       |
| United Kingdom | 17,352           | 0.55%                      | 90.54%                       |

*Notes:* The top ten countries are listed in this table. The remaining countries make up 9.46 percent of the sample, with each country making up less than 0.55% of the total sample.

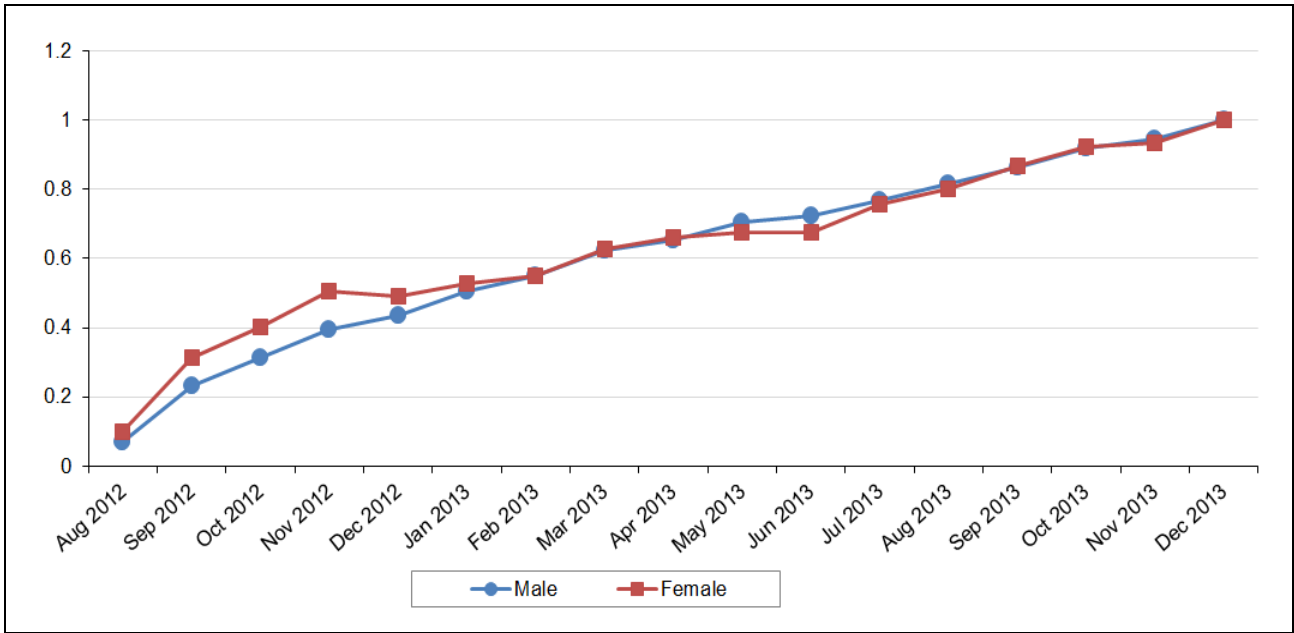

**Figure C1: Share of workers who posted photos in each month, split by gender**

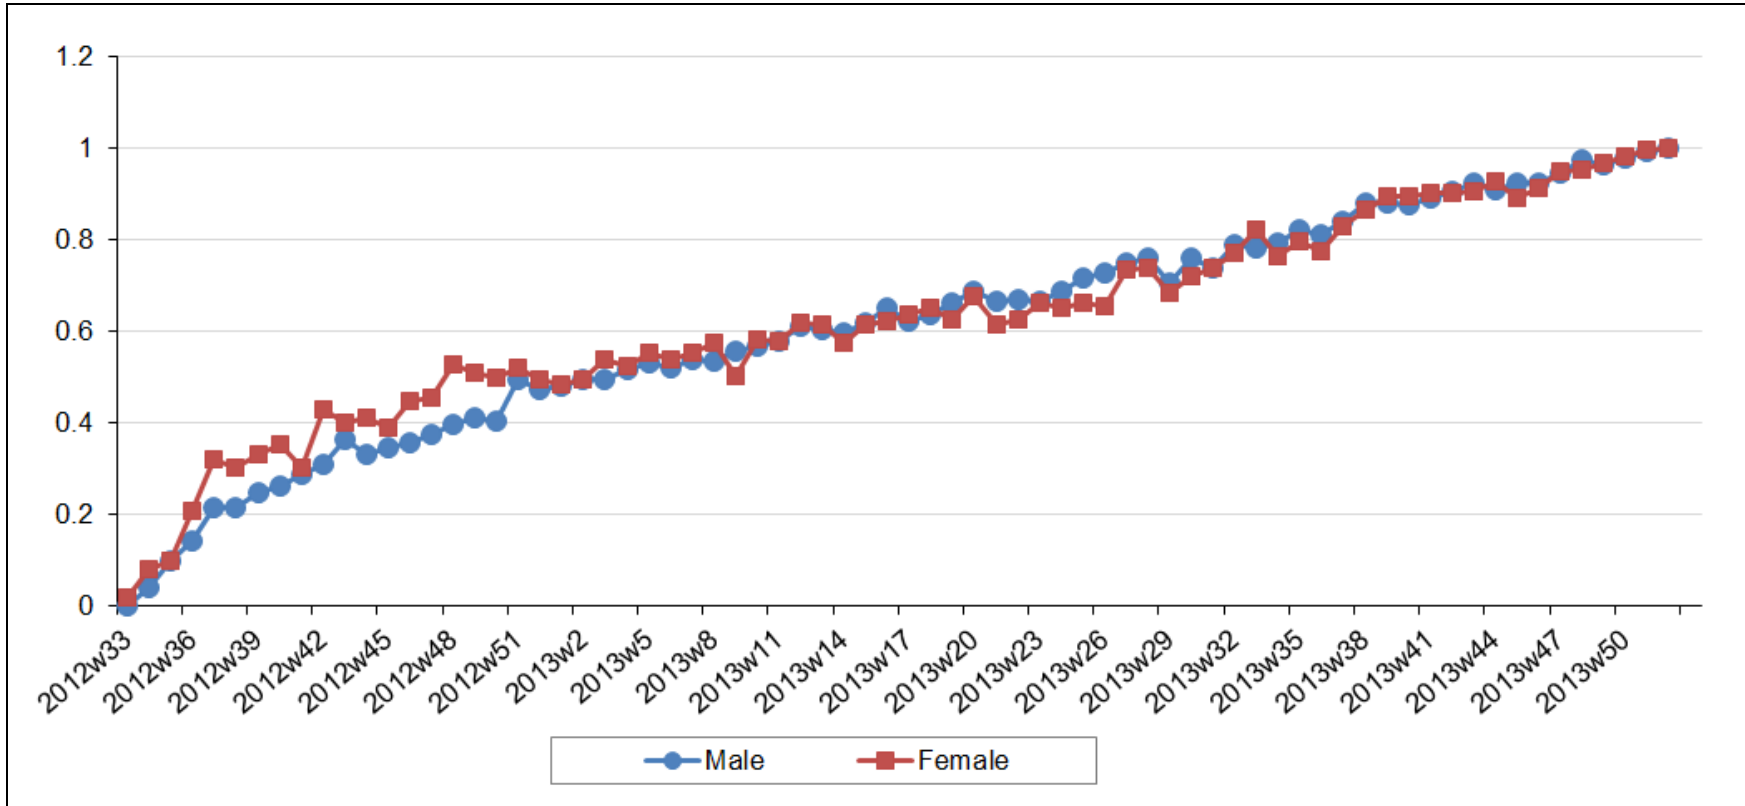

**Figure C2: Share of workers who posted photos in each week, split by gender**

Note: The x-axis starts with Week 33 in 2012 and ends with Week 51 in 2013. The scale starts from Week 1 for periods in 2013.

## Appendix D: Robustness Checks

In Column 1 of Table D1, we estimate a basic model based on the entire sample of workers to understand the effect of gender on the likelihood of getting hired. In Column 2, covariates are added to control for factors such as worker's wage rate, ability, and credentials. In Columns 3 and 4, we repeat the same analysis on job openings that consist of applicants from countries that represent the top 90 percent of the study sample. This is done with the aim of deriving results from a more homogenous sample of jobs in which workers are more comparable to one another, so as to abstract away potential outlier effects stemming from observations with uncommon characteristics.<sup>1</sup> Finally, in Column 5, we include country fixed effects to control for heterogeneity in hiring preferences towards workers' country of origin. The result in Column 1 shows a positive female coefficient statistically significant at the 1% level,<sup>2</sup> suggesting that female workers experience a higher likelihood of getting hired compared to their male counterparts. Upon the addition of covariates in Column 2, we find that the magnitude of the female coefficient dips a little but continues to be positive and significant. In Columns 3 and 4, the female coefficient is highly comparable to the respective coefficients in Columns 1 and 2, indicating that the female effect on hiring outcomes is robust with the removal of outlier observations. In Column 5, we see that the magnitude of the female coefficient drops by half when the country fixed effects are added, but retains its statistical significance.

---

<sup>1</sup> Workers removed in this step represent rare instances of the sample. Each of these workers' country of origin constituted less than 0.55 percent of the study sample.

<sup>2</sup> Following the guideline in Lin et al. (2013) which treats observations greater than 10,000 as a large sample size, we adopt a cutoff point of 1% when interpreting statistical significance for such instances in our study context.

**Table D1: Worker's Gender and Hiring Probability (Without Matching)**

|                                      | All Countries       |                      | Countries in Top 90% of Sample |                      |                      |
|--------------------------------------|---------------------|----------------------|--------------------------------|----------------------|----------------------|
|                                      | (1)                 | (2)                  | (3)                            | (4)                  | (5)                  |
| Female                               | 0.261***<br>(0.008) | 0.204***<br>(0.009)  | 0.269***<br>(0.009)            | 0.214***<br>(0.010)  | 0.111***<br>(0.010)  |
| <i>Job-Specific Controls:</i>        |                     |                      |                                |                      |                      |
| Log (Hourly Rate)                    |                     | -0.192***<br>(0.006) |                                | -0.233***<br>(0.007) | -0.329***<br>(0.007) |
| Employer Invitation                  |                     | 1.640***<br>(0.014)  |                                | 1.706***<br>(0.016)  | 1.647***<br>(0.016)  |
| Sent Cover Letter                    |                     | 0.214***<br>(0.011)  |                                | 0.230***<br>(0.013)  | 0.240***<br>(0.013)  |
| Previously Hired                     |                     | 2.166***<br>(0.031)  |                                | 2.226***<br>(0.036)  | 2.237***<br>(0.036)  |
| <i>Worker-Declared Attributes:</i>   |                     |                      |                                |                      |                      |
| Education                            |                     | -0.010***<br>(0.003) |                                | -0.006*<br>(0.003)   | 0.005<br>(0.003)     |
| Number of Certificates               |                     | -0.025***<br>(0.003) |                                | -0.026***<br>(0.003) | -0.012***<br>(0.003) |
| Past Employment                      |                     | 0.028***<br>(0.002)  |                                | 0.030***<br>(0.002)  | 0.017***<br>(0.002)  |
| English Proficiency                  |                     | 0.046***<br>(0.008)  |                                | 0.075***<br>(0.010)  | 0.128***<br>(0.011)  |
| Number of Portfolio Items            |                     | -0.001***<br>(0.000) |                                | -0.001***<br>(0.000) | 0.000<br>(0.000)     |
| From Developing Country              |                     | -0.532***<br>(0.012) |                                | -0.687***<br>(0.017) | -                    |
| <i>Platform-Verified Attributes:</i> |                     |                      |                                |                      |                      |
| Number of Tests                      |                     | 0.003***<br>(0.001)  |                                | 0.005***<br>(0.001)  | 0.007***<br>(0.001)  |
| Feedback Rating                      |                     | 0.124***<br>(0.002)  |                                | 0.133***<br>(0.003)  | 0.134***<br>(0.003)  |
| Number of Online Jobs                |                     | 0.003***<br>(0.000)  |                                | 0.004***<br>(0.000)  | 0.004***<br>(0.000)  |
| Agency Contractor                    |                     | -0.441***<br>(0.011) |                                | -0.415***<br>(0.012) | -0.402***<br>(0.012) |
| Worker Country Fixed Effects         |                     |                      |                                |                      | ✓                    |
| Log Likelihood                       | -231988.4           | -213881.6            | -187485.1                      | -171799.5            | -170469.9            |
| Observations                         | 1,907,940           | 1,907,940            | 1,558,390                      | 1,558,390            | 1,558,390            |

**Notes:** All models are conditional logistic regressions with job posting fixed effects. The outcome variable is whether a worker is hired. \* Significant at 10% level, \*\* significant at 5% level, and \*\*\* significant at 1% level. We adopt a cut-off point of 1% level in our interpretation for specifications that have large sample sizes (> 10,000). Coefficient for From Developing Country in column 5 is not estimated as country fixed effects are applied in this specification.

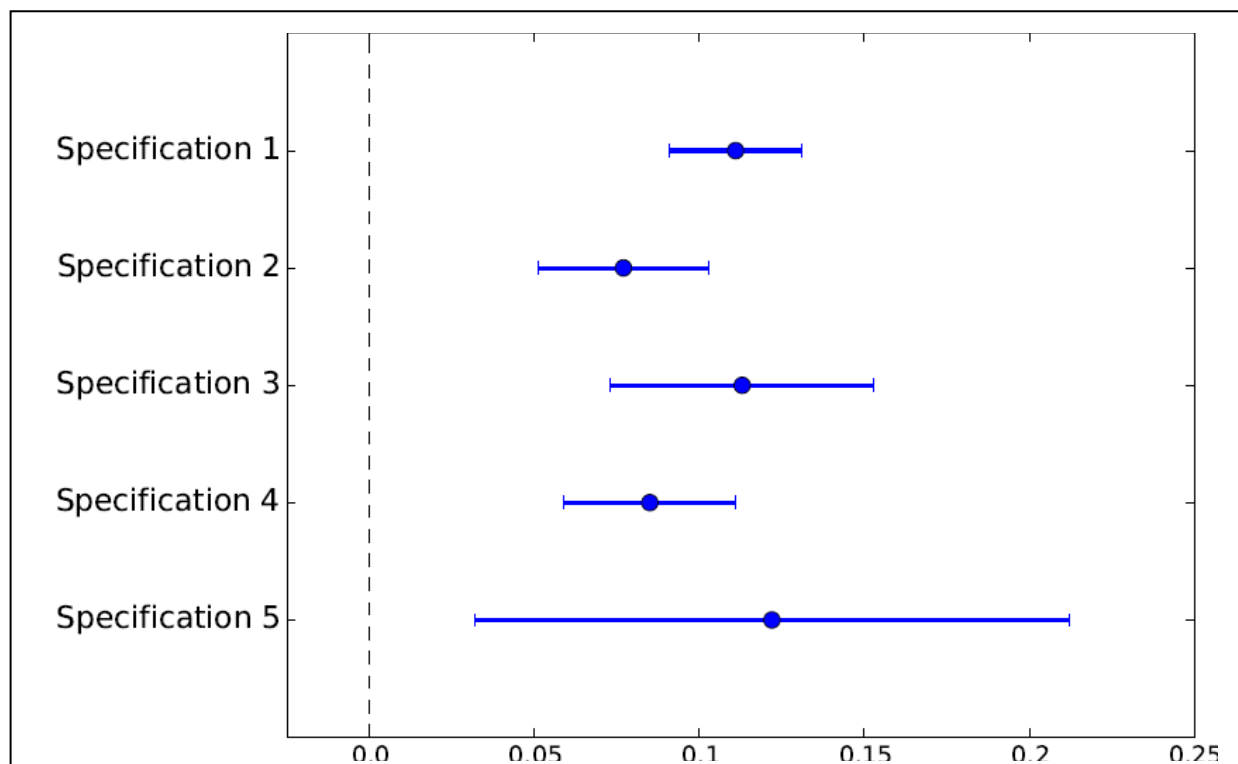

**Figure D1: The 95% Confidence Intervals for the Female Coefficient in Table 2**

**Table D2: Robustness Checks**

|                                           | No Matching         | <u>Job Category Match</u> |                      | <u>Job Posting Match</u> |                      |
|-------------------------------------------|---------------------|---------------------------|----------------------|--------------------------|----------------------|
|                                           |                     | Caliper Size = 0.01       | Caliper Size = 0.001 | Caliper Size = 0.01      | Caliper Size = 0.001 |
| (A) Alternative DV: Employer Invitation   | 0.097***<br>(0.010) | 0.239***<br>(0.015)       | 0.243***<br>(0.015)  | 0.259***<br>(0.025)      | 0.210***<br>(0.058)  |
| (B) Alternative DV: Interview Request     | 0.113***<br>(0.007) | 0.173***<br>(0.009)       | 0.183***<br>(0.009)  | 0.234***<br>(0.013)      | 0.273***<br>(0.025)  |
| (C) Observations without cover letter     | 0.092***<br>(0.011) | 0.067***<br>(0.015)       | 0.074***<br>(0.015)  | 0.108***<br>(0.023)      | 0.120**<br>(0.050)   |
| (D) Alternative DV: Shortlisted Worker    | 0.192***<br>(0.008) | 0.164***<br>(0.011)       | 0.169***<br>(0.011)  | 0.206***<br>(0.014)      | 0.224***<br>(0.028)  |
| (E) Observations from Fixed-Fee Contracts | 0.090***<br>(0.010) | 0.087***<br>(0.014)       | 0.089***<br>(0.014)  | 0.147***<br>(0.023)      | 0.172***<br>(0.056)  |

**Notes:** All reported estimates are the coefficients for female variable in our conditional logit model. Control variables are the same as those used in the main models, except for (A): the hourly wage displayed on the worker's profile page is used in place of proposed hourly wage, since the worker has not applied for the job at the time of invitation. We adopt a cut-off point of 1% significance level in our interpretation for specifications that have large sample sizes (> 10,000). \* significant at 10% level, \*\* significant at 5% level, and \*\*\* significant at 1% level.

## Appendix E: Additional Analyses

### *Employer Experience*

To understand whether increased employer experience weakens the influence of gender heuristics on hiring decisions, we evaluate the moderating effect of employer experience on female hiring bias. In particular, we rerun the conditional logit regressions on different subsamples of employers, split by their hiring experience on the platform. In this analysis, we measure employers' experience using the number of filled job postings (i.e., postings with hires made) on the platform. To differentiate between high and low experience levels, we split the sample of employers into upper and lower quartiles of the hiring experience. We report the results of this analysis below in Table E1.

**Table E1: Moderating Effect of Employer Experience**

| <b>Lower Quartile<br/>(Low Experience<br/>Employers)</b>  | <b>No Matching</b> | <b>Job Category Match</b> |                         | <b>Job Posting Match</b> |                         |
|-----------------------------------------------------------|--------------------|---------------------------|-------------------------|--------------------------|-------------------------|
|                                                           |                    | Caliper Size =<br>0.01    | Caliper Size =<br>0.001 | Caliper Size =<br>0.01   | Caliper Size =<br>0.001 |
|                                                           | Female             | 0.168***<br>(0.016)       | 0.118***<br>(0.022)     | 0.125***<br>(0.022)      | 0.170***<br>(0.035)     |
| Controls Added                                            | ✓                  | ✓                         | ✓                       | ✓                        | ✓                       |
| Country Fixed Effects                                     | ✓                  | ✓                         | ✓                       | ✓                        | ✓                       |
| Log Likelihood                                            | -60289.91          | -21195.44                 | -20347.83               | -6317.80                 | -1049.44                |
| Observations                                              | 458,636            | 124,800                   | 119,807                 | 43,959                   | 6,475                   |
| <b>Upper Quartile<br/>(High Experience<br/>Employers)</b> | <b>No Matching</b> | <b>Job Category Match</b> |                         | <b>Job Posting Match</b> |                         |
|                                                           |                    | Caliper Size =<br>0.01    | Caliper Size =<br>0.001 | Caliper Size =<br>0.01   | Caliper Size =<br>0.001 |
| Female                                                    | 0.009<br>(0.022)   | -0.018<br>(0.028)         | -0.012<br>(0.028)       | 0.017<br>(0.043)         | -0.148<br>(0.095)       |
| Controls Added                                            | ✓                  | ✓                         | ✓                       | ✓                        | ✓                       |
| Country Fixed Effects                                     | ✓                  | ✓                         | ✓                       | ✓                        | ✓                       |
| Log Likelihood                                            | -37980.42          | -14024.74                 | -13545.01               | -4882.68                 | -914.10                 |
| Observations                                              | 398,651            | 112,787                   | 109,697                 | 47,234                   | 8,468                   |

**Notes:** All models are conditional logistic regressions with job posting fixed effects. Control variables are the same as those used in the main models. To conserve space, covariate estimates are omitted. \* significant at 10% level, \*\* significant at 5% level, and \*\*\* significant at 1% level.

Across various matching criteria, we see that the gender coefficients from the *low experience* employers are positively significant, while those for *high experience* employers are nonsignificant. These results indicate that hiring bias mainly exists for new employers who have little hiring experience on the labor platform, and the bias diminishes as employers make more hires on the platform. Furthermore, we note that the magnitude of the female coefficient for employers with low hiring experience is about 10 times as large as that for employers with high hiring experience. This set of result provides further indication that gender cues represent a cognitive proxy for trustworthiness, which becomes less pertinent as employers

develop trust for all workers on the platform through their past interactions with other workers.

### *Worker's Country of Origin*

Next, we examine the moderating relationship between worker's country of origin and the worker's gender. As revealed in our literature review, the worker's country of origin can serve as a critical source of information that mitigates the uncertainty in hiring, and acting as a substitute for trustworthiness provided by the gender cue. If this is indeed true, we would expect the female hiring bias to be weaker in cases where employers are able to select applicants from developed countries, and vice versa.

**Table E2: Moderating Effect of Worker's Country of Origin**

| Developed Countries   | No Matching       | Job Category Match     |                         | Job Posting Match      |                         |
|-----------------------|-------------------|------------------------|-------------------------|------------------------|-------------------------|
|                       |                   | Caliper Size =<br>0.01 | Caliper Size =<br>0.001 | Caliper Size =<br>0.01 | Caliper Size =<br>0.001 |
| Female                | -0.011<br>(0.036) | -0.039<br>(0.048)      | -0.004<br>(0.050)       | 0.049<br>(0.110)       | -0.636<br>(0.495)       |
| Controls Added        | ✓                 | ✓                      | ✓                       | ✓                      | ✓                       |
| Country Fixed Effects | ✓                 | ✓                      | ✓                       | ✓                      | ✓                       |
| Log Likelihood        | -8928.00          | -3821.77               | -3497.15                | -388.88                | -23.24                  |
| Observations          | 31,154            | 12,623                 | 11,409                  | 1,276                  | 88                      |

  

| Developing Countries  | No Matching         | Job Category Match     |                         | Job Posting Match      |                         |
|-----------------------|---------------------|------------------------|-------------------------|------------------------|-------------------------|
|                       |                     | Caliper Size =<br>0.01 | Caliper Size =<br>0.001 | Caliper Size =<br>0.01 | Caliper Size =<br>0.001 |
| Female                | 0.125***<br>(0.011) | 0.097***<br>(0.014)    | 0.098***<br>(0.014)     | 0.129***<br>(0.021)    | 0.146***<br>(0.046)     |
| Controls Added        | ✓                   | ✓                      | ✓                       | ✓                      | ✓                       |
| Country Fixed Effects | ✓                   | ✓                      | ✓                       | ✓                      | ✓                       |
| Log Likelihood        | -147222.20          | -52079.44              | -50459.65               | -19189.41              | -3633.41                |
| Observations          | 1,387,565           | 381,830                | 371,142                 | 167,873                | 28,455                  |

**Notes:** All models are conditional logistic regressions with job posting fixed effects. Control variables are the same as those used in the main models. To conserve space, covariate estimates are omitted. \* significant at 10% level, \*\* significant at 5% level, and \*\*\* significant at 1% level.

We examine the moderating effect of worker's country of origin by running our main analyses using samples split by workers from developed and developing countries. Results of this analysis are presented in Table E2. We see the female hiring bias is present only in the sample of workers from developing countries across all specifications. In fact, the female coefficients for the observations from developed countries are close to zero,<sup>3</sup> signifying that a gender hiring bias is absent for these workers. The magnitude of the female coefficient for workers from developing countries is highly comparable to the

<sup>3</sup> This is true for all specifications except for the matched sample derived under job posting matching with a caliper size of 0.001. We note the coefficient size in this specification should be interpreted with caution as the sample size is greatly reduced under this stringent form of matching.

respective coefficients in main analyses in Table 2, suggesting that the female hiring bias uncovered in this study is likely to arise mainly from situations where employers are considering applicants from developing countries. This result supports the argument that employers are less dependent on gender heuristics when there are other trust-related indicators available for consideration.

### *Occupation Types*

We attempt to investigate the interrelationship between gender-typed occupations and the online hiring bias by examining their interaction effects. To do so, we repeat our estimations separately for feminine jobs, gender-neutral jobs, and masculine jobs. In Table E3, we report the regression results under different matching schemes. Across various matching schemes, we see that the female variable holds positive and significant coefficients for feminine jobs, signifying that female workers have a higher probability of being hired in administrative support and customer support positions. In contrast, the female variable in masculine jobs is negative and does not show consistent statistical significance across matching schemes, which suggests that male candidates do not enjoy an employment advantage in masculine occupations. This result is surprising as it deviates from the expectation that males are generally favored in masculine jobs. We posit that this aberrant trend results from the unique characteristics associated with the male heuristic cue. Concerned with the uncertainty and opportunism within the online market, employers may perceive male traits of self-centeredness and aggressiveness as factors that can undermine the success of their outsourced projects. In other words, the male heuristic cue lacks qualities such as concern for others and the desire to maintain interpersonal harmony, which are essential trust-related traits needed in online contexts involving economic transactions.

Interestingly, we note that the female coefficient is positive for jobs posted under the gender-neutral occupations. While the coefficients are not significant across different matching schemes, the direction of the coefficient is consistent in showing a positive bias toward female workers for gender-neutral jobs. The positive magnitude observed in gender-neutral jobs may partly account for the overall positive female hiring bias seen in the main analyses. Similar to the arguments made earlier, characteristics associated with female stereotypes may be perceived as crucial evaluation criteria for hiring employees in online environments, leading to a preference for female candidates for gender-neutral jobs in which no specific gender has a clear advantage in terms of competency.

**Table E3: Hiring Likelihood for Different Occupation Types**

|                                             | No Matching          |                      |                      | Job Category Match   |                      |                      | Job Posting Match    |                      |                      |
|---------------------------------------------|----------------------|----------------------|----------------------|----------------------|----------------------|----------------------|----------------------|----------------------|----------------------|
|                                             | Feminine<br>(1)      | Neutral<br>(2)       | Masculine<br>(3)     | Feminine<br>(4)      | Neutral<br>(5)       | Masculine<br>(6)     | Feminine<br>(7)      | Neutral<br>(8)       | Masculine<br>(9)     |
| Female                                      | 0.340***<br>(0.023)  | 0.056***<br>(0.017)  | -0.024<br>(0.020)    | 0.406***<br>(0.029)  | 0.023<br>(0.021)     | -0.105***<br>(0.029) | 0.507***<br>(0.087)  | 0.036<br>(0.071)     | -0.043<br>(0.093)    |
| <b><i>Job-Specific Controls:</i></b>        |                      |                      |                      |                      |                      |                      |                      |                      |                      |
| Log (Hourly Rate)                           | -0.609***<br>(0.016) | -0.267***<br>(0.013) | -0.297***<br>(0.013) | -0.726***<br>(0.025) | -0.308***<br>(0.018) | -0.398***<br>(0.029) | -1.165***<br>(0.095) | -0.490***<br>(0.084) | -0.518***<br>(0.164) |
| Employer Invitation                         | 1.800***<br>(0.041)  | 1.848***<br>(0.029)  | 1.651***<br>(0.026)  | 2.190***<br>(0.069)  | 1.813***<br>(0.041)  | 1.687***<br>(0.059)  | 2.956***<br>(0.304)  | 3.137***<br>(0.215)  | 2.269***<br>(0.287)  |
| Sent Cover Letter                           | 0.416***<br>(0.030)  | 0.262***<br>(0.020)  | 0.147***<br>(0.028)  | 0.453***<br>(0.042)  | 0.330***<br>(0.027)  | 0.135**<br>(0.057)   | 0.366**<br>(0.151)   | 0.165<br>(0.104)     | 0.346*<br>(0.203)    |
| Previously Hired                            | 2.616***<br>(0.083)  | 2.191***<br>(0.066)  | 2.241***<br>(0.058)  | 2.784***<br>(0.177)  | 2.084***<br>(0.129)  | 1.758***<br>(0.168)  | -                    | -                    | -                    |
| <b><i>Worker-Declared Attributes:</i></b>   |                      |                      |                      |                      |                      |                      |                      |                      |                      |
| Education                                   | 0.036***<br>(0.009)  | -0.013**<br>(0.006)  | -0.013**<br>(0.006)  | 0.014<br>(0.013)     | -0.022**<br>(0.009)  | 0.001<br>(0.012)     | 0.013<br>(0.047)     | -0.053<br>(0.036)    | 0.038<br>(0.048)     |
| Number of Certificates                      | -0.015**<br>(0.006)  | -0.019***<br>(0.006) | -0.015**<br>(0.007)  | -0.007<br>(0.011)    | -0.025***<br>(0.009) | 0.000<br>(0.017)     | -0.060<br>(0.046)    | -0.137***<br>(0.047) | 0.123<br>(0.079)     |
| Past Employment                             | 0.017***<br>(0.004)  | 0.017***<br>(0.003)  | 0.010**<br>(0.004)   | 0.018***<br>(0.006)  | 0.031***<br>(0.005)  | 0.012<br>(0.010)     | 0.049*<br>(0.025)    | 0.102***<br>(0.031)  | -0.079<br>(0.058)    |
| English Proficiency                         | 0.203***<br>(0.025)  | 0.094***<br>(0.020)  | 0.103***<br>(0.018)  | 0.207***<br>(0.038)  | 0.101***<br>(0.030)  | 0.140***<br>(0.046)  | 0.364***<br>(0.136)  | -0.022<br>(0.141)    | -0.063<br>(0.206)    |
| Number of Portfolio Items                   | 0.007***<br>(0.001)  | 0.000<br>(0.000)     | 0.000<br>(0.001)     | 0.007***<br>(0.002)  | 0.001<br>(0.001)     | 0.002<br>(0.001)     | 0.004<br>(0.011)     | 0.015***<br>(0.005)  | -0.005<br>(0.007)    |
| <b><i>Platform-Verified Attributes:</i></b> |                      |                      |                      |                      |                      |                      |                      |                      |                      |
| Number of Tests                             | 0.015***<br>(0.002)  | 0.008***<br>(0.002)  | 0.000<br>(0.002)     | 0.020***<br>(0.004)  | 0.005*<br>(0.003)    | 0.003<br>(0.004)     | 0.012<br>(0.016)     | 0.003<br>(0.013)     | -0.017<br>(0.019)    |
| Feedback Rating                             | 0.170***<br>(0.006)  | 0.143***<br>(0.005)  | 0.107***<br>(0.004)  | 0.170***<br>(0.008)  | 0.143***<br>(0.006)  | 0.122***<br>(0.008)  | 0.216***<br>(0.029)  | 0.214***<br>(0.024)  | 0.169***<br>(0.036)  |
| Number of Online Jobs                       | 0.004***<br>(0.000)  | 0.003***<br>(0.000)  | 0.004***<br>(0.000)  | 0.004***<br>(0.000)  | 0.004***<br>(0.000)  | 0.004***<br>(0.001)  | 0.009***<br>(0.003)  | 0.004**<br>(0.002)   | 0.010***<br>(0.002)  |
| Agency Contractor                           | -0.440***<br>(0.039) | -0.160***<br>(0.022) | -0.466***<br>(0.017) | -0.335***<br>(0.054) | -0.183***<br>(0.030) | -0.552***<br>(0.034) | -0.658***<br>(0.241) | -0.170<br>(0.115)    | -0.629***<br>(0.149) |
| Country Fixed Effects                       | ✓                    | ✓                    | ✓                    | ✓                    | ✓                    | ✓                    | ✓                    | ✓                    | ✓                    |
| Log Likelihood                              | -34931.95            | -51984.68            | -47651.46            | -14264.35            | -25062.49            | -10641.47            | -5531.44             | -7055.77             | -3690.73             |
| Observations                                | 472,074              | 516,300              | 330,760              | 125,960              | 199,708              | 50,615               | 53,590               | 69,720               | 17,232               |

**Notes:** All models are conditional logistic regressions with job posting fixed effects. Control variables are the same as those used in Table 2. Coefficient for Previously Hired in Columns 7-9 is not estimated as there is no variation for the variable in the matched sample within each job posting. We adopt a cut-off point of 1% level in our interpretation for specifications that have large sample sizes (> 10,000). \* significant at 10% level, \*\* significant at 5% level, and \*\*\* significant at 1% level.

## Employer Gender

Finally, we examine whether the employer's gender moderates online hiring bias. We study this moderating effect by examining whether the positive female hiring bias is stronger for female or male employers. In executing the analysis, we split the job postings into two groups consisting of male and female employers and rerun the regression models on each sample separately. Table E4 presents the results of this analysis. We find that the positive female hiring bias is present for both male and female employers. Of greater interest, we find that female employers exhibit a stronger female-oriented hiring bias compared to male employers. In particular, female employers are about two times more likely to hire female workers, relative to male employers. This result suggests that female applicants are generally favored by employers of both genders, but relatively more so by female hirers. Such a result is in agreement with the existing literature which suggests that the processing strategy of male hirers reduces their tendency to rely on peripheral gender cues in evaluating candidates.

**Table E4: Moderating Effect of Employer Gender**

| Male Employer         | No Matching         | Job Category Match     |                         | Job Posting Match      |                         |
|-----------------------|---------------------|------------------------|-------------------------|------------------------|-------------------------|
|                       |                     | Caliper Size =<br>0.01 | Caliper Size =<br>0.001 | Caliper Size =<br>0.01 | Caliper Size =<br>0.001 |
| Female                | 0.099***<br>(0.013) | 0.063***<br>(0.016)    | 0.064***<br>(0.017)     | 0.108***<br>(0.026)    | 0.112**<br>(0.056)      |
| Controls Added        | ✓                   | ✓                      | ✓                       | ✓                      | ✓                       |
| Country Fixed Effects | ✓                   | ✓                      | ✓                       | ✓                      | ✓                       |
| Log Likelihood        | -109752.96          | -39104.28              | -37594.53               | -13125.07              | -2429.11                |
| Observations          | 1,006,854           | 278,267                | 268,548                 | 113,284                | 18,738                  |

  

| Female Employer       | No Matching         | Job Category Match     |                         | Job Posting Match      |                         |
|-----------------------|---------------------|------------------------|-------------------------|------------------------|-------------------------|
|                       |                     | Caliper Size =<br>0.01 | Caliper Size =<br>0.001 | Caliper Size =<br>0.01 | Caliper Size =<br>0.001 |
| Female                | 0.222***<br>(0.026) | 0.178***<br>(0.034)    | 0.194***<br>(0.035)     | 0.295***<br>(0.056)    | 0.335***<br>(0.127)     |
| Controls Added        | ✓                   | ✓                      | ✓                       | ✓                      | ✓                       |
| Country Fixed Effects | ✓                   | ✓                      | ✓                       | ✓                      | ✓                       |
| Log Likelihood        | -23077.94           | -8946.54               | -8649.72                | -2586.17               | -444.803                |
| Observations          | 205,406             | 58,208                 | 56,200                  | 21,224                 | 3,370                   |

**Notes:** All models are conditional logistic regressions with job posting fixed effects. Control variables are the same as those used in the main models. To conserve space, covariate estimates are omitted. \* significant at 10% level, \*\* significant at 5% level, and \*\*\* significant at 1% level.

## References

Caliendo, M., & Kopeinig, S. (2008). Some Practical Guidance for the Implementation of Propensity Score Matching. *Journal of Economic Surveys*, 22(1), 31-72.
